# Supplementary material for: Hollow Cu-doped NiO microspheres as anode materials with enhanced lithium storage performance
Source: Royal Society of Chemistry journal article supplement (doi:10.1039/c9ra03780b), 2019-01-01
Supplement: c9ra03780b1.pdf [file c9ra03780b1.pdf]

Supporting Information

## Hollow Cu-doped NiO microspheres as anode materials with enhanced lithium storage performance

Qiwen Hu,<sup>a</sup> Wenyao Li\*,<sup>a</sup> Dina Ibrahim Abouelamaiem,<sup>b</sup> Chaoting Xu,<sup>c</sup> Haishun Jiang,<sup>a</sup> Weihua Han<sup>d\*</sup> and Guanjie He\*<sup>b</sup>

<sup>a</sup>*School of Material Engineering, Shanghai University of Engineering Science, Shanghai 201620, China.*

<sup>b</sup>*Materials Chemistry Centre, Department of Chemistry, University College London, 20, Gordon Street, London WC1H 0AJ, UK.*

<sup>c</sup>*State Key Laboratory for Modification of Chemical Fibers and Polymer Materials, College of Materials Science and Engineering, Donghua University, Shanghai 201620, China*

<sup>d</sup>*School of Physical Science and Technology, Lanzhou University, Lanzhou 730000, China*

*E-mail: liwenyao314@gmail.com; guanjie.he.14@ucl.ac.uk; hanwh@lzu.edu.cn*

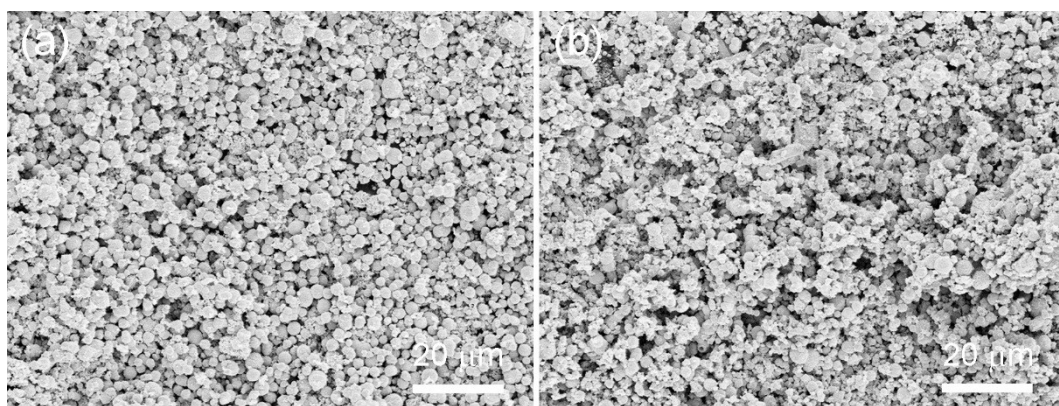

Fig. S1 Low magnification SEM images of (a) NiO and (b) Cu-doped NiO.

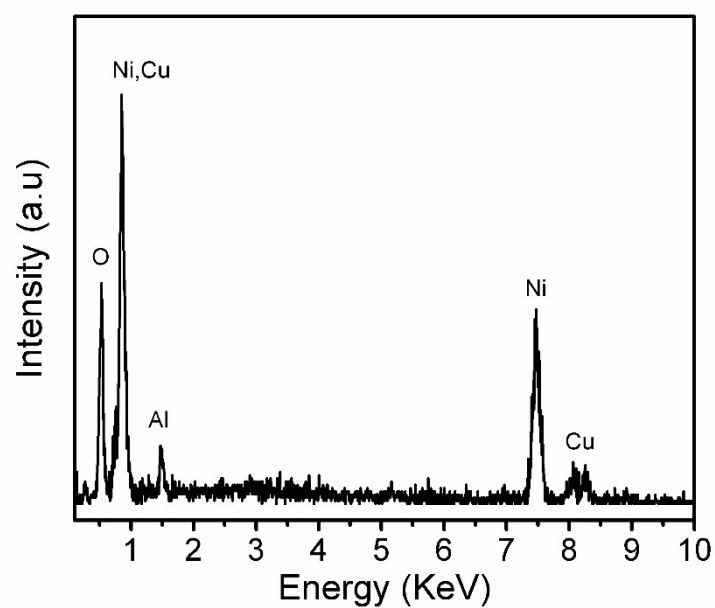

Fig. S2 EDS pattern of Cu-doped NiO.

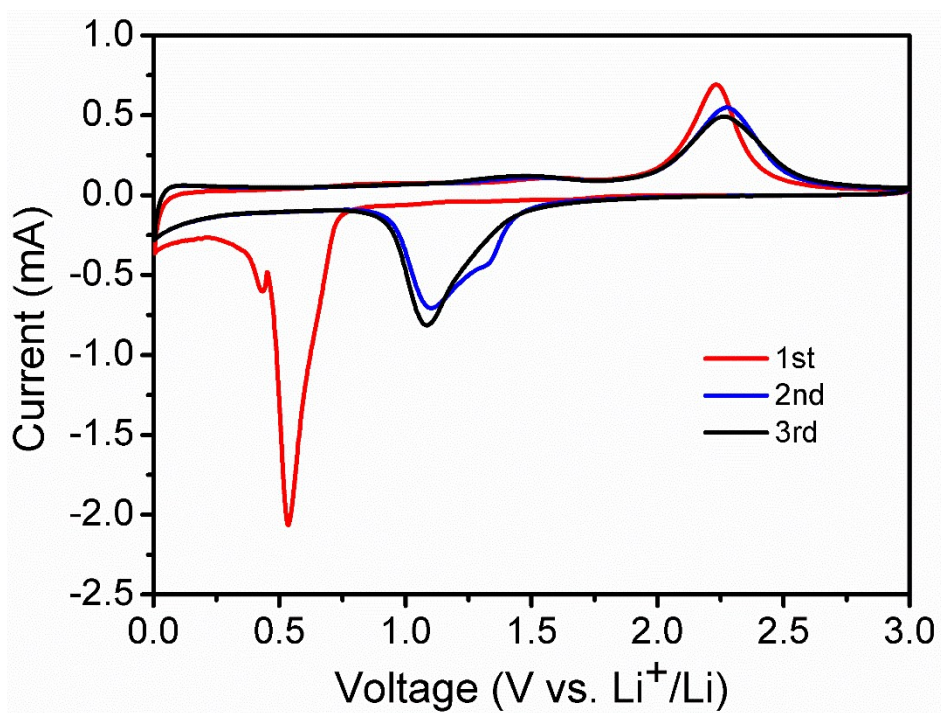

Fig. S3 First three consecutive CV curves of Cu-doped NiO at 0.1 mV s<sup>-1</sup> scan rate.

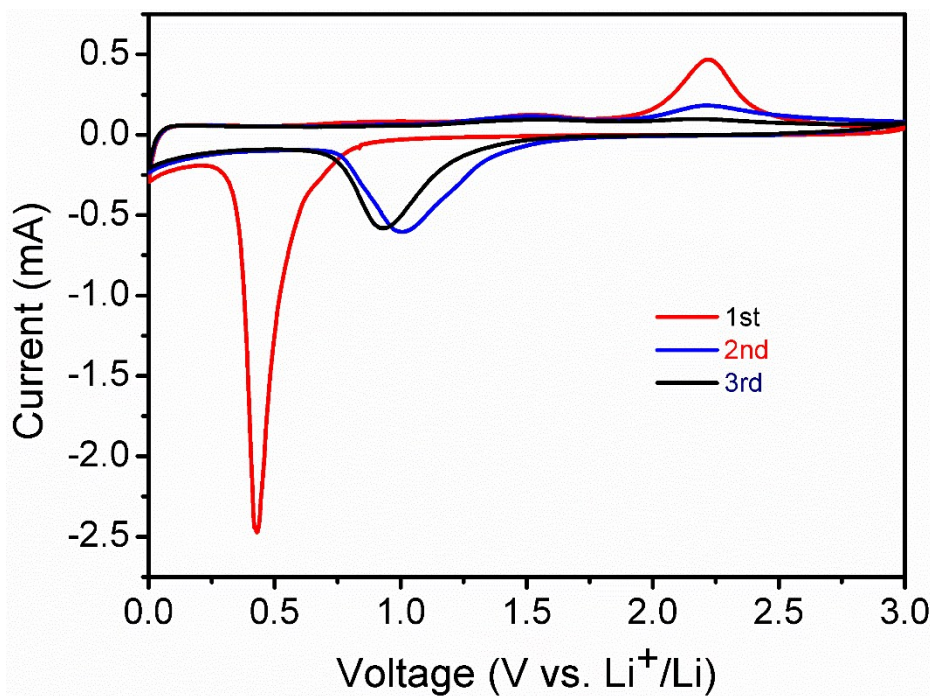

Fig. S4 First three consecutive CV curves of NiO at  $0.1 \text{ mV s}^{-1}$ .

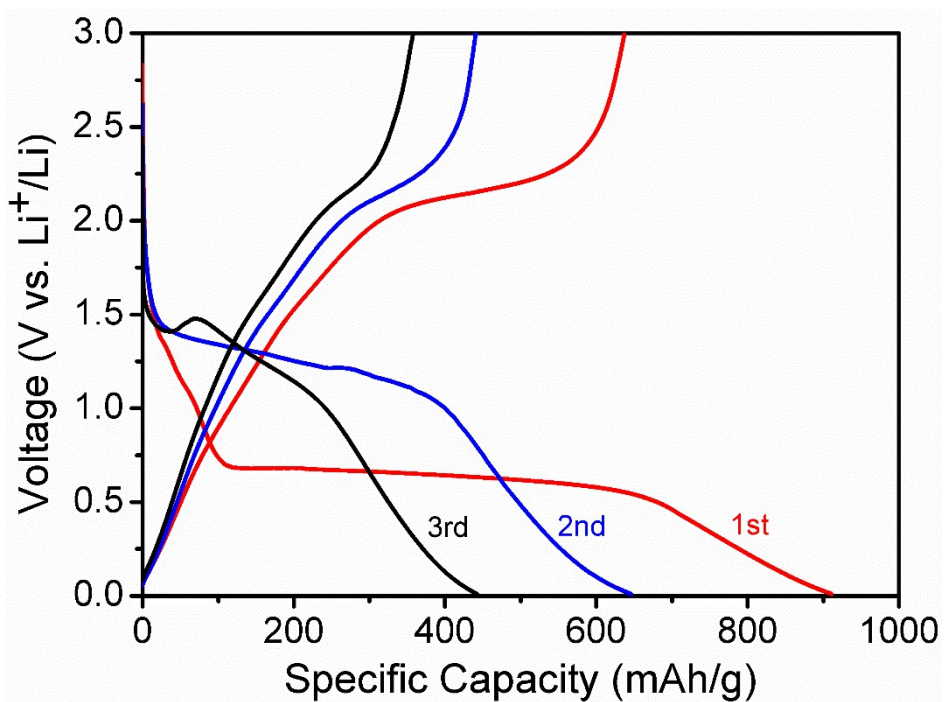

Fig. S5 Galvanostatic discharge and charge profiles of the 1<sup>st</sup>, 2<sup>nd</sup> and 3<sup>rd</sup> cycles of NiO at a current density of  $100 \text{ mA g}^{-1}$ ,
